# Supplementary material
Source: publisher site journal article supplement (https://www.spandidos-publications.com/8620/downloadSupplementary)
Supplement: Supplementary file 1 [file downloadSupplementary]

Table SI. Antibody information.

| Antibody      | Supplier                        | Cat. no. | Dilution |
|---------------|---------------------------------|----------|----------|
| GAPDH         | ImmunoWay Biotechnology Company | YN5585   | 1:1,000  |
| IL-6          | ABclonal Biotech Co., Ltd.      | A22222   | 1:1,000  |
| Occludin      | Abcam                           | ab222691 | 1:2,000  |
| Claudin-1     | Abcam                           | ab180158 | 1:1,000  |
| ZO-1          | Abcam                           | ab216880 | 1:1,000  |
| p62           | Abcam                           | ab109012 | 1:10,000 |
| IL-1 $\beta$  | Abcam                           | ab234437 | 1:1,000  |
| AKT           | Affinity Biosciences            | AF6216   | 1:1,000  |
| p-AKT         | Affinity Biosciences            | AF0016   | 1:1,000  |
| mTOR          | Affinity Biosciences            | AF6308   | 1:1,000  |
| p-mTOR        | Affinity Biosciences            | AF3308   | 1:1,000  |
| PI3K          | Affinity Biosciences            | AF6241   | 1:1,000  |
| p-PI3K        | Affinity Biosciences            | AF3242   | 1:1,000  |
| TNF- $\alpha$ | ABclonal Biotech Co., Ltd.      | A0277    | 1:1,000  |
| IL-10         | ABclonal Biotech Co., Ltd.      | A22288   | 1:1,000  |
| ULK1          | ABclonal Biotech Co., Ltd.      | A21024   | 1:1,000  |
| ATG13         | ABclonal Biotech Co., Ltd.      | A0690    | 1:1,000  |
| Beclin        | ABclonal Biotech Co., Ltd.      | A22361   | 1:2,000  |
| ATG5          | ABclonal Biotech Co., Ltd.      | A0203    | 1:1,000  |
| ATG7          | ABclonal Biotech Co., Ltd.      | A19604   | 1:1,500  |
| ATG12         | ABclonal Biotech Co., Ltd.      | A19610   | 1:1,000  |

|                                                        |                                                              |         |         |
|--------------------------------------------------------|--------------------------------------------------------------|---------|---------|
| Horseradish enzyme labelled goat anti-rabbit IgG (H+L) | ZSGB-BIO (Beijing Zhongshan Jinqiao Biotechnology Co., Ltd.) | ZB-5301 | 1:5,000 |
| Horseradish enzyme labelled goat anti-mouse IgG (H+L)  | ZSGB-BIO (Beijing Zhongshan Jinqiao Biotechnology Co., Ltd.) | ZB-2305 | 1:5,000 |

GAPDH, glyceraldehyde-3-phosphate dehydrogenase; IL, interleukin; ZO-1, zonula occludens-1; TNF, tumor necrosis factor; ULK1, Unc-51 like autophagy activating kinase 1; ATG, autophagy-related gene; p-, phosphorylated.

Table SII. Primer Sequences

| A, Mouse primers |                                                          |
|------------------|----------------------------------------------------------|
| Gene             | Sequence (5'-3')                                         |
| GAPDH            | F: GGGAAGCCCATCACCATCT<br>R: CGGCCTCACCCCATTTG           |
| TNF- $\alpha$    | F: CTCATGCACCACCATCAAGG<br>R: ACCTGACCACTCTCCCTTTG       |
| IL-6             | F: GAGACTTCCATCCAGTTGCC<br>R: AAGTGCATCATCGTTGTTCATACA   |
| IL-10            | F: GCTCTTACTGACTGGCATGAG<br>R: CGCAGCTCTAGGAGCATGTG      |
| IL-1 $\beta$     | F: GCAACTGTTCTGAACTCAACT<br>R: ATCTTTTGGGGTCCGTCAACT     |
| ATG5             | F: AGTCAAGTGATCAACGAAATGC<br>R: TATTCCATGAGTTTCCGGTTGA   |
| ATG7             | F: GTGTACGATCCCTGTAACCTAG<br>R: GATGCTATGTGTCACGTCTCTA   |
| LC3II            | F: TTATAGAGCGATACAAGGGGGAG<br>R: CGCCGTCTGATTATCTTGATGAG |
| p62              | F: TGTGGAACATGGAGGGAAGAG<br>R: TGTGCCTGTGCTGGAACCTTC     |
| PI3K             | F: CCTCAGCTCTCACCCCTCCT<br>R: TTGGTCTCTCTTTCCGCTCAC      |
| AKT              | F: TGAGAAGAAGCTGAGCCCAC<br>R: TAGGAGAACTTGATCAGGCGG      |
| mTOR             | F: CCGCTACTGTGTCTTGGCAT<br>R: CAGCTCGCGGATCTCAAAGA       |
| B, Human primers |                                                          |
| Gene             | Sequence (5'-3')                                         |
| GAPDH            | F: CAGGAGGCATTGCTGATGAT<br>R: GAAGGCTGGGG CTCATTT        |
| TNF- $\alpha$    | F: CCTCTCTCTAATCAGCCCTCTG                                |

|              |                                                           |
|--------------|-----------------------------------------------------------|
|              | R: GAGGACCTGGGAGTAGATGAG                                  |
| IL-6         | F: ACTCACCTCTTCAGAACGAATTG<br>R: CCATCTTTGGAAGGTTTCAGGTTG |
| IL-10        | F: GACTTTAAGGGTTACCTGGGTTG<br>R: TCACATGCGCCTTGATGTCTG    |
| IL-1 $\beta$ | F: ATGATGGCTTATTACAGTGGCAA<br>R: GTCGGAGATTCGTAGCTGGA     |

F, forward; R, reverse; GAPDH, glyceraldehyde-3-phosphate dehydrogenase; TNF, tumor necrosis factor; IL, interleukin; ATG, autophagy-related gene.
